# Supplementary material
Source: Springer Nature journal article supplement (https://www.springermedizin.de/resource/supplementary/13075_2012_4437_MOESM8_ESM.pdf/10110406)

# 1) ECM turnover

REFERENCE NODE

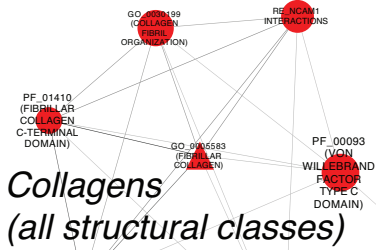

**Contact activation pathway (coagulation)**

BL INTRINSIC PATHWAY

# 2) Gap junctions

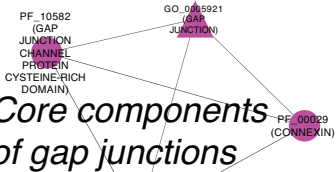

A

# 1) ECM turnover

REFERENCE NODE

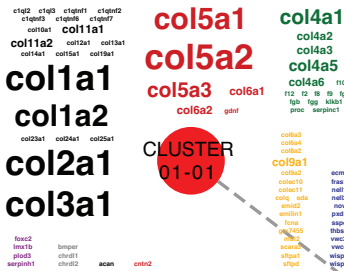

# 2) Gap junctions

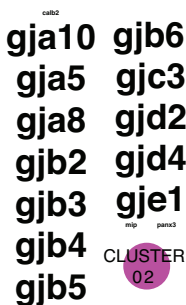

B

# 3) Neurotransmission

**Positive regulation of nerve impulses**

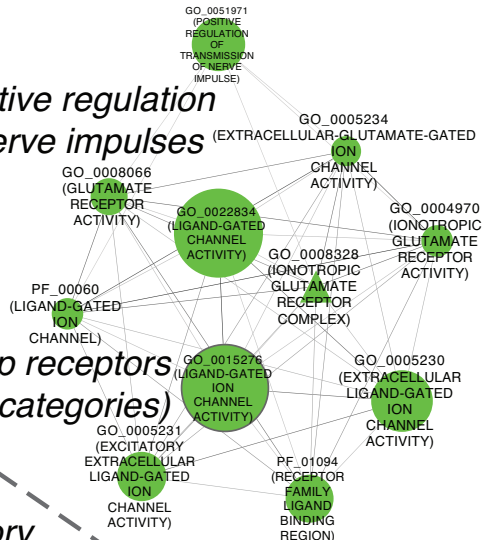

**Angioinhibitory signals**

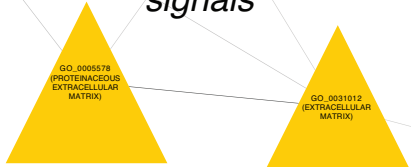

**Mmp-mediated collagenolysis**

# 3) Neurotransmission

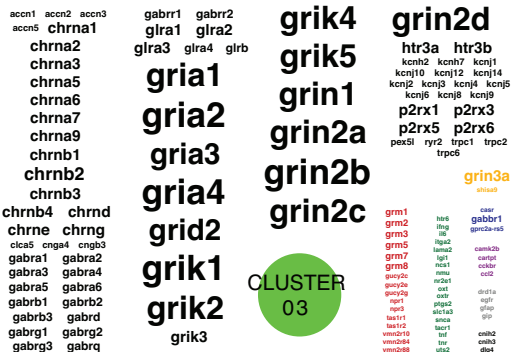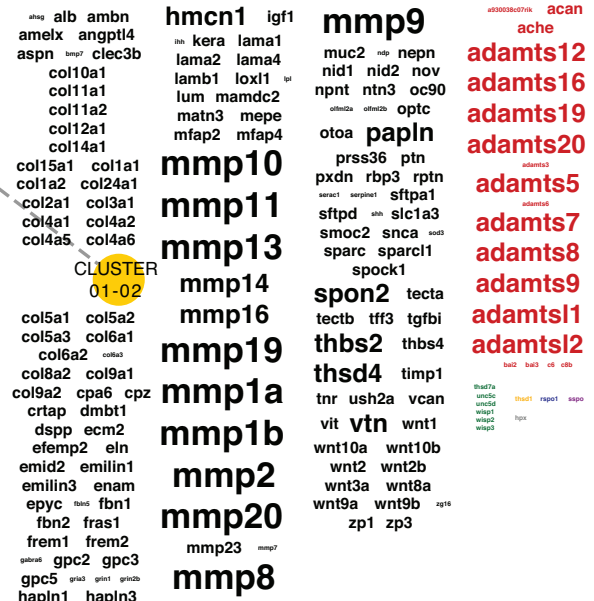

Supplement: MOESM8 [file 10110406]
